# Supplementary material for: Polymer nanowires or nanopores? Site selective filling of titania nanotubes with polypyrrole
Source: Royal Society of Chemistry journal article supplement (doi:10.1039/c1jm12379c), 2011-01-01
Supplement: c1jm12379c.pdf [file c1jm12379c.pdf]

## Polymer nanowires or nanopores? Site selective filling of titania nanotubes with polypyrrole

Damian Kowalski\*, Alexei Tighineanu and Patrik Schmuki\*

Department of Materials Science, University of Erlangen-Nürnberg,  
Martensstrasse 7, D-91058 Erlangen, Germany. Fax: +49-9131-85 275 82; Tel: +49-9131-85 275 82;  
E-mail: kowalski@cat.hokudai.ac.jp, E-mail: patrik.schmuki@ww.uni-erlangen.de

### ESI1. TiO<sub>2</sub> nanotubes annealed in argon

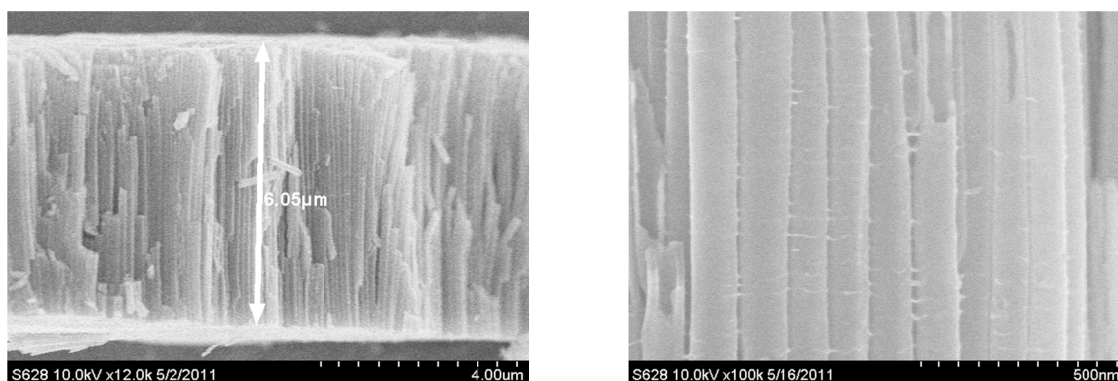

**Fig. ESI1** Cross-section view of titania nanotubes formed in ethylene glycol electrolyte containing hydrofluoric acid (0.2M) and 2 vol.% of water. Titania nanotubes were annealed in argon atmosphere at 350°C for 20h.

### ESI2. XPS surface analysis

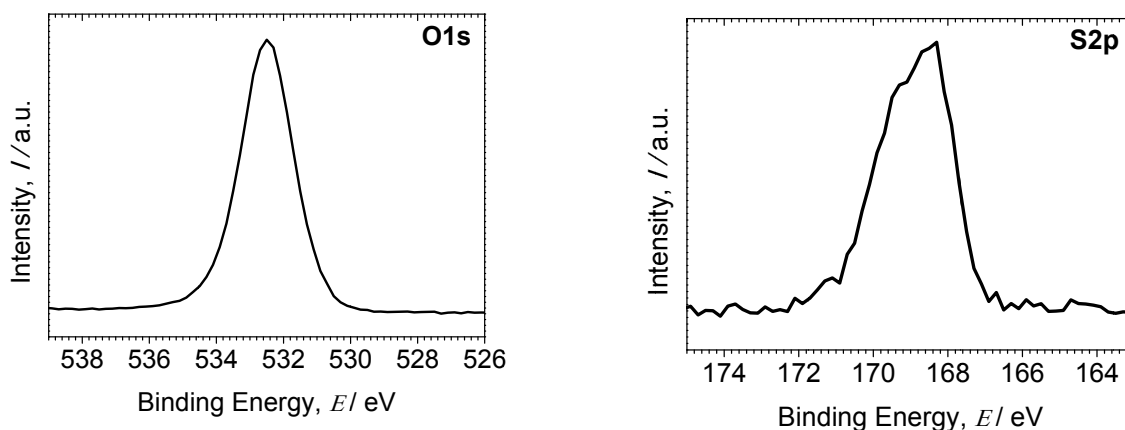

**Fig. ESI2** Core level photoelectron peaks for polypyrrole formed in TiO<sub>2</sub> nanotubes matrix, a) O1s b) S2p

### ESI3.ToF-SIMS negative spectra

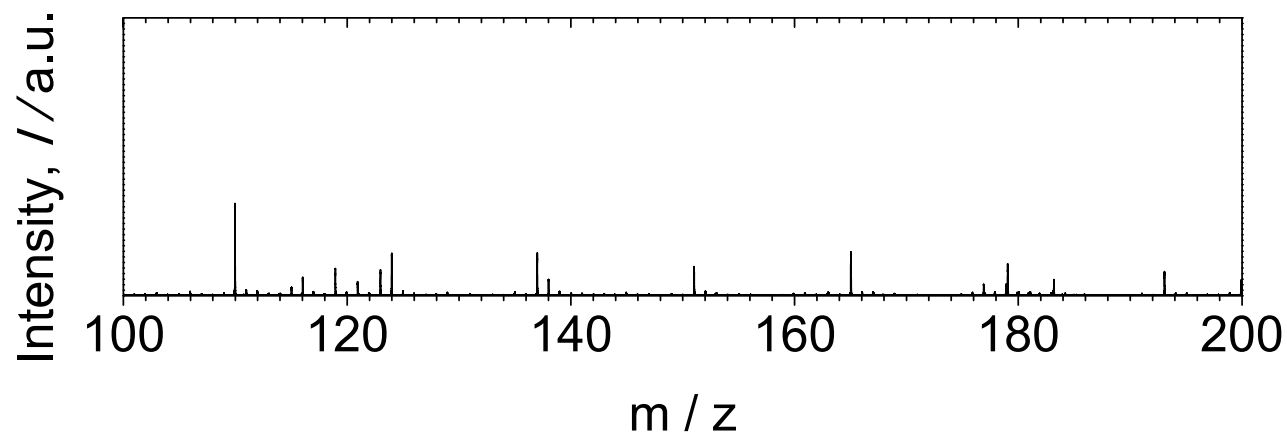

**Fig. ESI3** Negative ion ToF-SIMS spectrum ( $m/z$  100-200) for polypyrrole obtained by electrodeposition in titania template.
